# Supplementary material for: Enhanced capacitive desalination of MnO2 by forming composite with multi-walled carbon nanotubes
Source: Royal Society of Chemistry journal article supplement (doi:10.1039/c5ra26210k), 2016-01-01
Supplement: c5ra26210k1.pdf [file c5ra26210k1.pdf]

## Supporting Information

### Enhanced capacitive desalination of MnO<sub>2</sub> by forming composite with multi-walled carbon nanotubes

Binwei Chen,<sup>a</sup> Yanfang Wang,<sup>a</sup> Zheng Chang,<sup>a</sup> Xiaowei Wang,<sup>a</sup> Minxia Li,<sup>a</sup> Xiang Liu,<sup>b\*</sup> Lixin Zhang<sup>a,\*</sup>, and Yuping Wu<sup>a,b,\*</sup>

The pristine  $\delta$ -MnO<sub>2</sub> was prepared as follows. First, 100 mL of 0.1 mol/L MnSO<sub>4</sub> solution was mixed with 100 mL of 0.1 mol/L (NH<sub>4</sub>)<sub>2</sub>S<sub>2</sub>O<sub>8</sub> solution. Upon stirring this solution at room temperature, 50 ml of 1 mol/L NaOH solution was added dropwise, and a dark brown precipitate was immediately formed. Finally, the product was filtered and washed thoroughly with deionized water followed by drying at 80 °C overnight.
